# Supplementary material for: Type III Secretion 1 Effector Gene Diversity Among Vibrio Isolates From Coastal Areas in China
Source: Front Cell Infect Microbiol. 2020 Jun 18;10:301. doi: 10.3389/fcimb.2020.00301 (PMC7318850; doi:10.3389/fcimb.2020.00301)
Supplement: Supplemental Table 1 — Strains used in this study. [file Table_1.XLSX]

## Sheet: Sheet1
Strains	Species	Sources	T3SS1			T3SS2α			T3SS2β			Type of genetic organization in effector coding regions of T3SS1
			VcrD	VscC	VopB	VscN2α	VscT2α	VscR2α	VscN2β	VscT2β	VscR2β
HN312	Vibrio aerogenes	Sea water, Sanya	○	○	○	○	○	○	○	○	○
HN351	Vibrio aerogenes	Sea water, Sanya	○	○	○	○	○	○	○	○	○
HN382	Vibrio aerogenes	Sea water, Haikou	○	○	○	○	○	○	○	○	○
A066	Vibrio alginolyticus	Shellfish, Guangzhou	●	●	●	○	○	○	○	○	○	Val-II
E019	Vibrio alginolyticus	Sea water, Shanwei	●	●	●	○	○	○	○	○	○	Val-II
E079	Vibrio alginolyticus	Sea water, Shanwei	●	●	●	○	○	○	○	○	○	Val-II
E308	Vibrio alginolyticus	Shrimp pond water, Huidong	●	●	●	○	○	○	○	○	○	Val-II
E312	Vibrio alginolyticus	Shrimp, Shantou	●	●	●	○	○	○	○	○	○	Val-II
E401	Vibrio alginolyticus	Sea water, Shenzhen	●	●	●	○	○	○	○	○	○	Val-I
E601	Vibrio alginolyticus	Sea water, Yangjiang	●	●	●	○	○	○	○	○	○	Val-II
HN175	Vibrio alginolyticus	Shellfish, Beihai	●	●	●	○	○	○	○	○	○	Val-II
HN281	Vibrio alginolyticus	Sea water, Sanya	●	●	●	○	○	○	○	○	○	Val-II
HN355	Vibrio alginolyticus	Sea water, Haikou	●	●	●	○	○	○	○	○	○	Val-II
HN399	Vibrio alginolyticus	Sea water, Shantou	●	●	●	○	○	○	○	○	○	Val-II
HN416	Vibrio alginolyticus	Shellfish, Shanwei	●	●	●	○	○	○	○	○	○	Val-II
HN498	Vibrio alginolyticus	Sea water, Zhanjiang	●	●	●	○	○	○	○	○	○	Val-II
HN558	Vibrio alginolyticus	Sea water, Beihai	●	●	●	○	○	○	○	○	○	Val-II
HN657	Vibrio alginolyticus	Sea water, Beihai	●	●	●	○	○	○	○	○	○	Val-II
HN966	Vibrio alginolyticus	Sea water, Haikou	●	●	●	○	○	○	○	○	○	Val-II
JS004	Vibrio alginolyticus	Sea water, Yancheng	●	●	●	○	○	○	○	○	○	Val-II
JS013	Vibrio alginolyticus	Fish, Yancheng	●	●	●	○	○	○	○	○	○	Val-II
JS019	Vibrio alginolyticus	Fish, Nantong	●	●	●	○	○	○	○	○	○	Val-II
JS025	Vibrio alginolyticus	Sea water, Yancheng	●	●	●	○	○	○	○	○	○	Val-II
A056	Vibrio alginolyticus	Fish, Zhanjiang	●	●	●	○	○	○	○	○	○	Val-I
A071	Vibrio alginolyticus	Sea water, Zhanjiang	●	●	●	○	○	○	○	○	○	Val-II
HS01	Vibrio alginolyticus	Sea water, Guangzhou	●	●	●	○	○	○	○	○	○	Val-II
HN897	Vibrio astriarenae	Sea water, Haikou	○	○	○	○	○	○	○	○	○
20546	Vibrio brasiliensis	LMG 20546	○	○	○	○	○	○	○	○	○
HN126	Vibrio brasiliensis	Shellfish, Qinzhou	○	○	○	○	○	○	○	○	○
JS024	Vibrio brasiliensis	Shrimp, Yancheng	○	○	○	○	○	○	○	○	○
E370	Vibrio campbellii	Seawater, Shenzhen	●	●	●	○	○	○	○	○	○	Vca-I
E373	Vibrio campbellii	Shrimp, Shenzhen	●	●	●	○	○	○	○	○	○	Vca-I
HN164	Vibrio campbellii	Shellfish, Beihai	●	●	●	○	○	○	○	○	○	Vca-I
A011	Vibrio campbellii	Shrimp, Zhanjiang	●	●	●	○	○	○	○	○	○	Vca-I
JS026	Vibrio campbellii	Sea water, Yancheng	●	●	●	○	○	○	○	○	○	Vca-I
A004	Vibrio campbellii	Shrimp, Zhanjiang	●	●	●	○	○	○	○	○	○	Vca-I
HN974	Vibrio chagasii	Sea water, Haikou	○	○	○	○	○	○	○	○	○
JS006	Vibrio chagasii	Sea water, Sheyang	○	○	○	○	○	○	○	○	○
JS015	Vibrio chagasii	Fish, Yancheng	○	○	○	○	○	○	○	○	○
JS016	Vibrio chagasii	Fish, Sheyang	○	○	○	○	○	○	○	○	○
JS017	Vibrio chagasii	Fish, Sheyang	○	○	○	○	○	○	○	○	○
JS023	Vibrio chagasii	Shrimp, Yancheng	○	○	○	○	○	○	○	○	○
JS029	Vibrio chagasii	Sea water, Sheyang	○	○	○	○	○	○	○	○	○
HN369	Vibrio cholerae	Sea water, Haikou	○	○	○	○	○	○	○	○	○
HN375	Vibrio cholerae	Sea water, Haikou	○	○	○	○	○	○	○	○	○
HN388	Vibrio cholerae	Sea water, Shantou	○	○	○	○	○	○	○	○	○
HN488	Vibrio cholerae	Sea water, Zhanjiang	○	○	○	○	○	○	○	○	○
HN168	Vibrio communis	Shellfish, Beihai	○	○	○	○	○	○	○	○	○
HN169	Vibrio communis	Shellfish, Beihai	○	○	○	○	○	○	○	○	○
JS018	Vibrio communis	Fish, Sheyang	○	○	○	○	○	○	○	○	○
JS021	Vibrio communis	Shrimp, Yancheng	○	○	○	○	○	○	○	○	○
JS022	Vibrio communis	Shrimp, Yancheng	○	○	○	○	○	○	○	○	○
JS027	Vibrio communis	Sea water, Yancheng	○	○	○	○	○	○	○	○	○
JS028	Vibrio communis	Sea water, Yancheng	○	○	○	○	○	○	○	○	○
20984	Vibrio coralliilyticus	LMG 20984	○	○	○	○	○	○	○	○	○
JS011	Vibrio crassostreae	Sea water, Rudong	○	○	○	○	○	○	○	○	○
JS010	Vibrio cyclitrophicus	Sea water, Nantong	○	○	○	○	○	○	○	○	○
JS012	Vibrio cyclitrophicus	Sea water, Rudong	○	○	○	○	○	○	○	○	○
33810	Vibrio fluvialis	ATCC 33810	○	○	○	○	○	○	○	○	○
HN1050	Vibrio fortis	Shellfish, Yangjiang	○	○	○	○	○	○	○	○	○
JS005	Vibrio fortis	Sea water, Sheyang	○	○	○	○	○	○	○	○	○
JS008	Vibrio fortis	Sea water, Sheyang	○	○	○	○	○	○	○	○	○
33813	Vibrio furnissii	ATCC 33813	○	○	○	○	○	○	○	○	○
JS001	Vibrio gigantis	Sea water, Yancheng	○	○	○	○	○	○	○	○	○
JS007	Vibrio gigantis	Sea water, Sheyang	○	○	○	○	○	○	○	○	○
E066	Vibrio harveyi	Sea water, Shenzhen	●	●	●	○	○	○	○	○	○	Vh-I
E067	Vibrio harveyi	Sea water,Shenzhen	●	●	●	○	○	○	○	○	○	Vh-I
E089	Vibrio harveyi	Sea water, Huizhou	●	●	●	○	○	○	○	○	○	Vh-I
E155	Vibrio harveyi	Sea water, Shenzhen	●	●	●	○	○	○	○	○	○	Vh-I
E385	Vibrio harveyi	Fish, Shenzhen	●	●	●	○	○	○	○	○	○	Vh-II
HN121	Vibrio harveyi	Shellfish, Yangjiang	●	●	●	○	○	○	○	○	○	Vh-I
HN385	Vibrio harveyi	Sea water, Qinzhou	●	●	●	○	○	○	○	○	○	Vh-II
HN435	Vibrio harveyi	Shrimp, Shanwei	●	●	●	○	○	○	○	○	○	Vh-II
HN453	Vibrio harveyi	Shrimp, Yangjiang	●	●	●	○	○	○	○	○	○	Vh-II
HS14	Vibrio harveyi	Shellfish, Huangsha market	●	●	●	○	○	○	○	○	○	Vh-III
HN456	Vibrio marisflavi	Sea water, Zhanjiang	○	○	○	○	○	○	○	○	○
1A03405	Vibrio mediterranei	MCCC 1A03405	○	○	○	○	○	○	○	○	○
33653	Vibrio mimicus	ATCC 33653	○	○	○	○	○	○	○	○	○
A012	Vibrio mimicus	Fish, Zhanjiang	○	○	○	○	○	○	○	○	○
33788	Vibrio mytili	ATCC 33788	○	○	○	○	○	○	○	○	○
20536	Vibrio neptunius	LMG 20536	○	○	○	○	○	○	○	○	○
HN535	Vibrio ordalii	Sea water, Qinzhou	○	○	○	○	○	○	○	○	○
HN1048	Vibrio ordalii	Shellfish, Yangjiang	○	○	○	○	○	○	○	○	○
17802	Vibrio parahaemolyticus	ATCC 17802	●	●	●	○	○	○	○	○	○	VP-II
E321	Vibrio parahaemolyticus	Shrimp pond, Shanwei	●	●	●	○	○	○	○	○	○	VP-I
E328	Vibrio parahaemolyticus	Shrimp pond water, Shanwei	●	●	●	○	○	○	○	○	○	VP-I
33847	Vibrio parahaemolyticus	ATCC 33847	●	●	●	●	●	●	○	○	○	VP-I
HN158	Vibrio parahaemolyticus	Shellfish, Beihai	●	●	●	○	○	○	○	○	○	VP-I
HN161	Vibrio parahaemolyticus	Shellfish, Beihai	●	●	●	○	○	○	○	○	○	VP-I
HN316	Vibrio parahaemolyticus	Shellfish, Sanya	●	●	●	○	○	○	○	○	○	VP-I
HN335	Vibrio parahaemolyticus	Shellfish, Sanya	●	●	●	○	○	○	○	○	○	VP-III
HN342	Vibrio parahaemolyticus	Shellfish, Sanya	●	●	●	○	○	○	○	○	○	VP-I
HN343	Vibrio parahaemolyticus	Shellfish, Sanya	●	●	●	○	○	○	○	○	○	VP-I
HN361	Vibrio parahaemolyticus	Shellfish, Haikou	●	●	●	○	○	○	○	○	○	VP-III
HN405	Vibrio parahaemolyticus	Sea water, Shantou	●	●	●	○	○	○	○	○	○	VP-II
HN410	Vibrio parahaemolyticus	Shellfish, Shantou	●	●	●	○	○	○	○	○	○	VP-I
HN449	Vibrio parahaemolyticus	Shrimp, Yangjiang	●	●	●	○	○	○	○	○	○	VP-I
HN948	Vibrio parahaemolyticus	Fish, Haikou	●	●	●	○	○	○	○	○	○	VP-I
HN978	Vibrio parahaemolyticus	Sea water, Haikou	●	●	●	○	○	○	○	○	○	VP-I
HN989	Vibrio parahaemolyticus	Sea water, Haikou	●	●	●	○	○	○	○	○	○	VP-I
JS002	Vibrio parahaemolyticus	Sea water, Yancheng	●	●	●	○	○	○	○	○	○	VP-I
JS014	Vibrio parahaemolyticus	Fish, Yancheng	●	●	●	○	○	○	○	○	○	VP-I
JS020	Vibrio parahaemolyticus	Fish, Nantong	●	●	●	○	○	○	○	○	○	VP-I
JS030	Vibrio parahaemolyticus	Sea water, Nantong	●	●	●	○	○	○	○	○	○	VP-I
JS031	Vibrio parahaemolyticus	Sea water, Nantong	●	●	●	○	○	○	○	○	○	VP-I
RIMD2210633	Vibrio parahaemolyticus	Clinical isolate, Makino et al., 2003	●	●	●	●	●	●	○	○	○	VP-I
HN1013	Vibrio rotiferianus	Shellfish, Yangjiang	○	○	○	○	○	○	○	○	○
19703	Vibrio shilonii	LMG 19703	○	○	○	○	○	○	○	○	○
HN935	Vibrio tasmaniensis	Sea water, Qinzhou	○	○	○	○	○	○	○	○	○
HN952	Vibrio tasmaniensis	Shellfish, Haikou	○	○	○	○	○	○	○	○	○
